# Supplementary material for: Optimization of Tobacco-Grain Intercropping Models Based on the Entropy Weight-TOPSIS Method
Source: Research Square preprint supplement (doi:10.21203/rs.3.rs-8429844/v1), 2026-01-30
Supplement: Supplementary file 1 [file affa7c18c5b39aac438021ff.docx]

**Supplemental figure：**

**
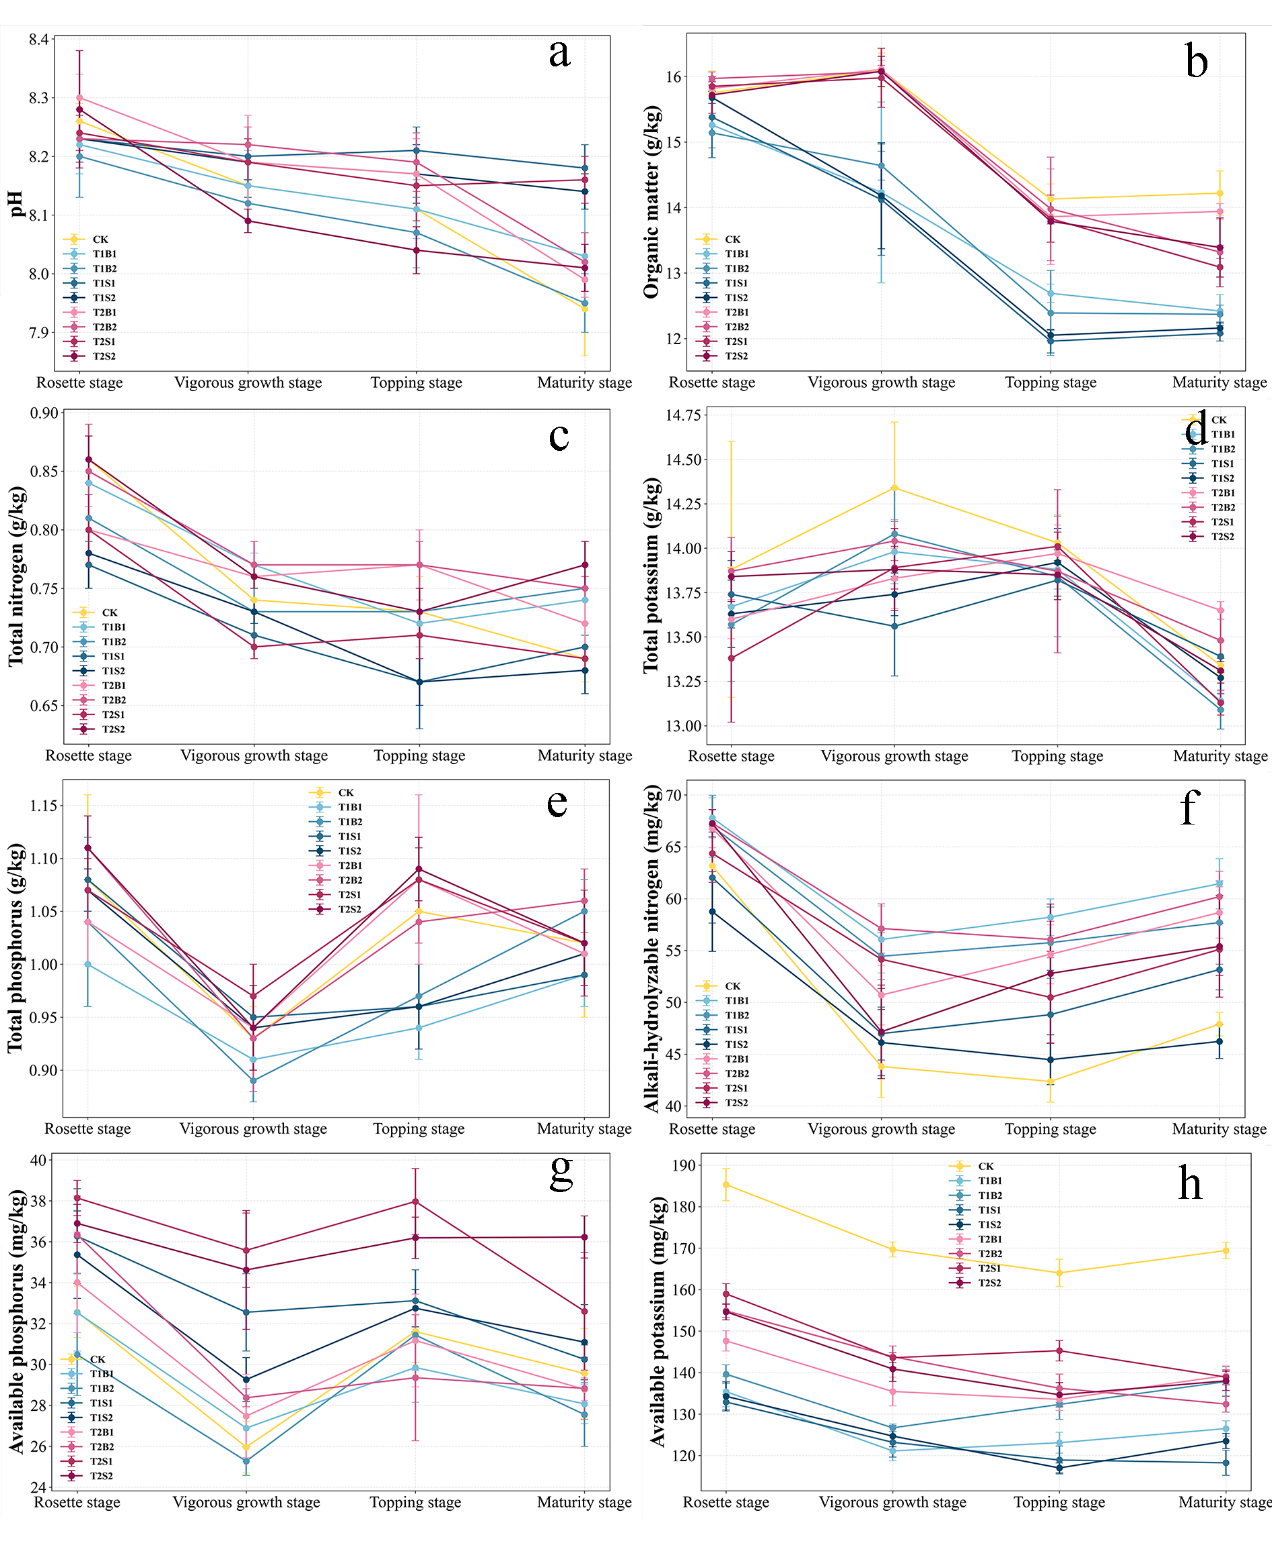
**

**Fig. A.1** Effects of intercropping on soil nutrients and pH. The figure displays the variations in eight soil indicators measured at the Rosette stage, Vigorous growth stage, Topping stage, and Maturity stage: (a) Soil pH; (b) Organic matter content (g/kg); (c) Total nitrogen content (g/kg); (d) Total potassium content (g/kg); (e) Total phosphorus content (g/kg); (f) Alkali-hydrolyzable nitrogen content (mg/kg); (g) Available phosphorus content (mg/kg); (h) Available potassium content (mg/kg).


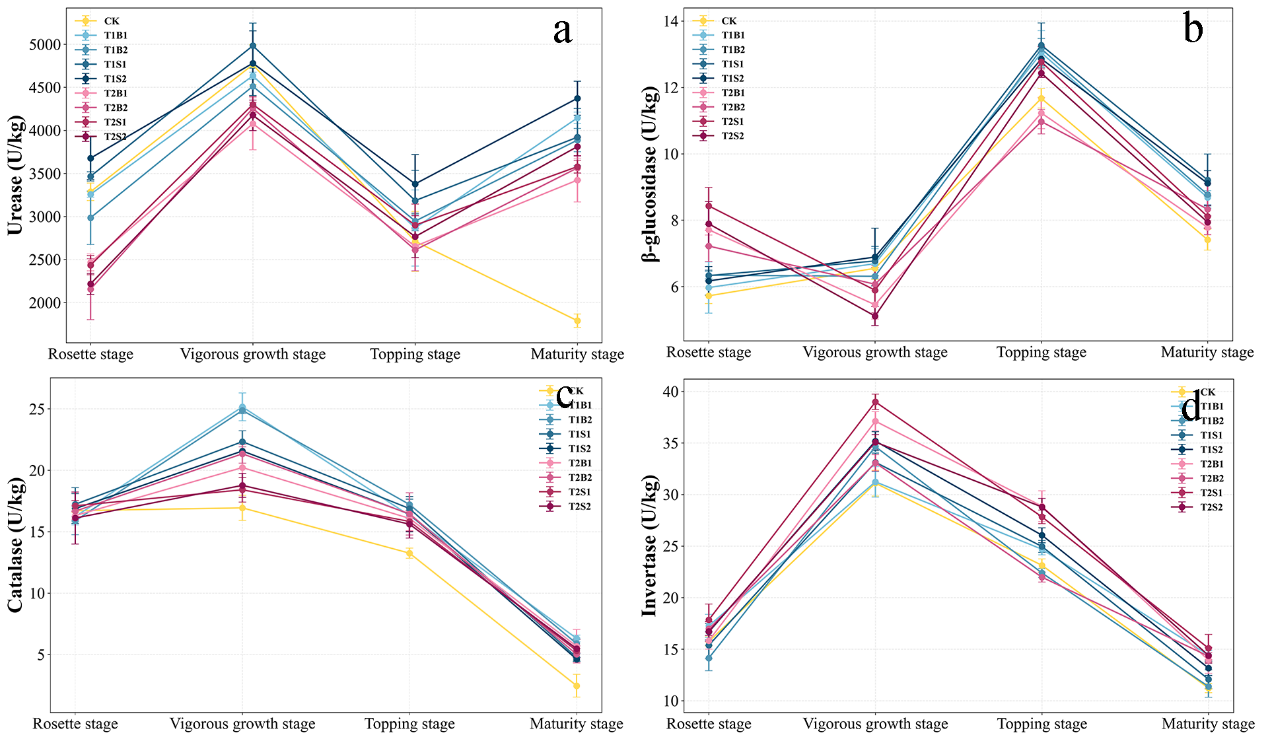


**Fig. A.2** Effects of intercropping on soil enzyme activities. The figure illustrates the fluctuations of four key soil enzymes across the Rosette, Vigorous growth, Topping, and Maturity stages: (a) Urease activity (U/kg); (b) β-glucosidase activity (U/kg); (c) Catalase activity (U/kg); (d) Invertase activity (U/kg).
